# Supplementary material for: Arsenite induces neurotoxic effects on AFD neurons via oxidative stress in Caenorhabditis elegans
Source: Royal Society of Chemistry journal article supplement (doi:10.1039/c4mt00160e), 2014-07-18

## Supplementary

**STable 1. Primers used for real-time PCR**

| <b>Gene</b> |         | <b>Sequence</b>                  |
|-------------|---------|----------------------------------|
| GCY-8       | forward | 5'-TGAGTCAACTGCTTCCAGCTTATG-3'   |
|             | reverse | 5'-AATGTCACTGAAAAGCACTGTTGAAC-3' |
| TTX-1       | forward | 5'-TCGGGAACGGACCACATTTA-3'       |
|             | reverse | 5'-CTTCT GCTGCCTGGCCTTT-3'       |
| TAX-2       | forward | 5'-ACATTTTCATCCGTATGGTCGTTT-3'   |
|             | reverse | 5'-CCGTGGTTTGATTAGCAGCAT-3'      |
| TAX-4       | forward | 5'-TATCCGGATGCAC GAAAGCT-3'      |
|             | reverse | 5'-GCTTGAGTGCTCCACGATGA-3'       |
| CEH-14      | forward | 5'-CCG GTGGAAGTCCTCAAATC-3'      |
|             | reverse | 5'-GGTGTCTGCTCTCTGGAGTGAA-3'     |
| ACT-1       | forward | 5'-GCTGGACGTGATCTTACTGATTACC-3'  |
|             | reverse | 5'-GTAGCAGAG CTTCTCCTTGATGTC-3'  |
| GFP         | forward | 5'-AGGGCTATGTGCAGGAGAGA-3'       |
|             | reverse | 5'-CTTGTGGCCGAGAATGTTTC-3'       |

**Figure S1. Effects of As(III) exposure on the mRNA levels of GFP in P<sub>gcy-8</sub>::GFP transgene *C. elegans*.** Synchronized L1 P<sub>gcy-8</sub>::GFP transgene larvae were incubated for 40 h at 20 °C. L4-stage worms were then treated with 100 µM of As(III) for 24 h at 20 °C. Subsequently, total RNAs from adult animals were extracted. mRNA levels of GFP were determined by quantitative real-time RT-PCR. The mRNA levels were normalized to the expression of ACT-1. The fold change was normalized to that observed in untreated control *C. elegans* samples. Error bars represent the standard error, and differences were considered significant at  $P < 0.05$  (\*),  $P < 0.01$  (\*\*), and  $P < 0.001$  (\*\*\*) according to one-way ANOVA and LSD post hoc testing. n.s., non-significant. “Control”, nematodes grown on a standard diet; “As(III)”, nematodes grown on a standard diet and followed by 100 µM As(III) exposure.

**Figure S1.**

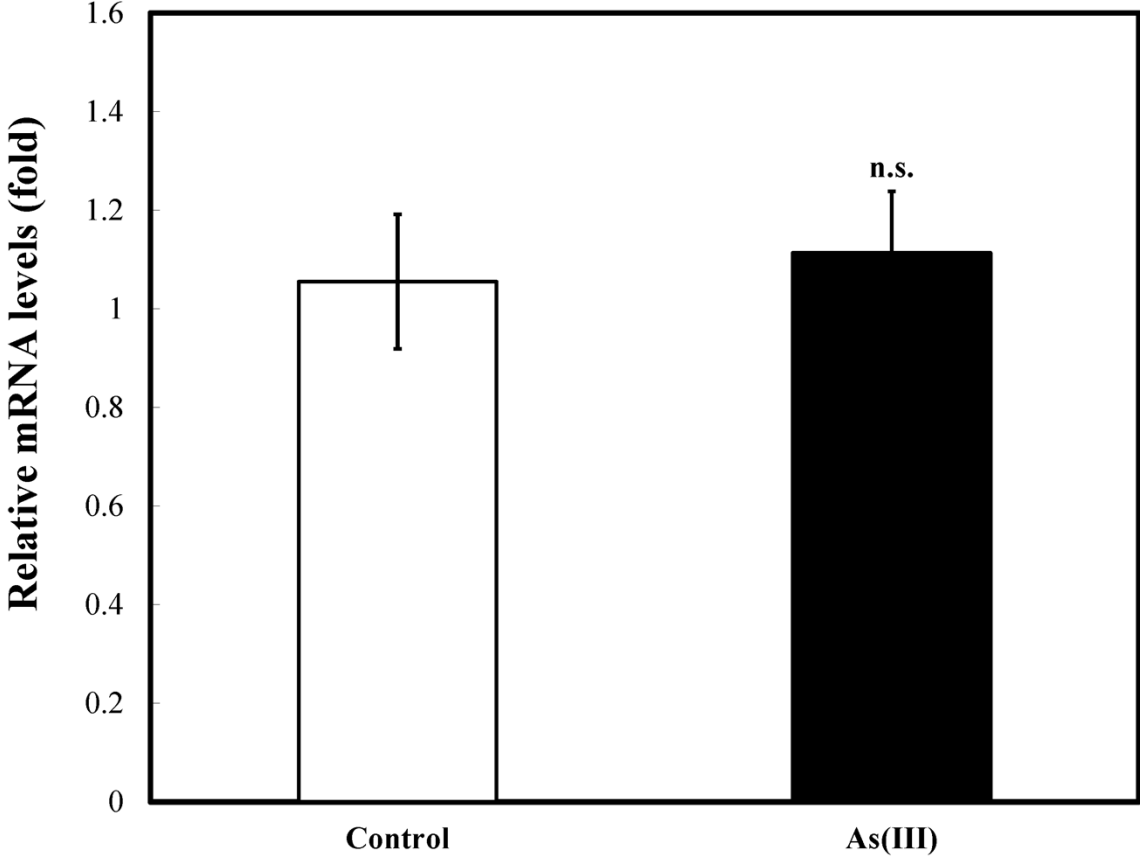

Supplement: c4mt00160e1.pdf [file c4mt00160e1.pdf]
